1 **Translation of dipeptide repeat proteins in *C9ORF72*-ALS/FTD through**  
2 **unique and redundant AUG initiation codons**

3

4 Yoshifumi Sonobe<sup>1,2,3</sup>, Soojin Lee<sup>4</sup>, Gopinath Krishnan<sup>4</sup>, Yuanzheng Gu<sup>5</sup>, Deborah Y. Kwon<sup>5</sup>  
5  
6 Fen-Biao Gao<sup>4</sup>, Raymond P. Roos<sup>1,2,3\*</sup>, Paschalis Kratsios<sup>1,3,6\*</sup>

7

8 \* These authors contributed equally.

9

10 **Correspondence:**

11 R.P.R ([rroos@neurology.bsd.uchicago.edu](mailto:rroos@neurology.bsd.uchicago.edu)), P.K ([pkratsios@uchicago.edu](mailto:pkratsios@uchicago.edu))

12

13 **Affiliations:**

14 <sup>1</sup> University of Chicago Medical Center, 5841 S. Maryland Ave., Chicago, IL 60637

15 <sup>2</sup> Department of Neurology, University of Chicago Medical Center, 5841 S. Maryland Ave., Chicago,  
16 IL 60637

17 <sup>3</sup> Neuroscience Institute, University of Chicago, Chicago, IL, USA

18 <sup>4</sup> Department of Neurology, University of Massachusetts Medical School, Worcester, MA 01605, USA

19 <sup>5</sup> Neuromuscular & Movement Disorders, Biogen, Cambridge, MA 02142, USA

20 <sup>6</sup> Department of Neurobiology, University of Chicago, Chicago, IL, USA

21

22 **ABSTRACT**

23 A hexanucleotide repeat expansion in the first intron of *C9ORF72* is the most common monogenic  
24 cause of amyotrophic lateral sclerosis (ALS) and frontotemporal dementia (FTD). A hallmark of  
25 ALS/FTD pathology is the presence of dipeptide repeat (DPR) proteins, produced from both sense  
26 GGGGCC (poly-GA, poly-GP, poly-GR) and antisense CCCC GG (poly-PR, poly-PG, poly-PA)  
27 transcripts. Although initiation codons and regulatory factors have been identified for sense DPR  
28 translation, they remain mostly unknown for antisense DPRs. Here, we show that an AUG initiation  
29 codon is necessary for poly-PR synthesis, suggesting canonical AUG dependent translation.  
30 Remarkably, although an AUG located 194 base pairs (bp) upstream of the repeat is the main start  
31 codon for poly-PG synthesis, two other AUG codons (-212 bp, -113 bp) can also initiate translation,  
32 demonstrating a striking redundancy in start codon usage. eIF2D is required for CUG start codon-  
33 dependent poly-GA translation from the sense transcript in human motor neurons derived from  
34 induced pluripotent stem cells of *C9ORF72* ALS/FTD patients, but AUG-dependent poly-PG or poly-  
35 PR synthesis does not require eIF2D, indicating that distinct translation initiation factors control DPR  
36 synthesis from sense and antisense transcripts. Our findings provide key molecular insights into DPR  
37 synthesis from the *C9ORF72* locus, which may be broadly applicable to many other nucleotide-repeat  
38 expansion disorders.

39

40

41

## 42 INTRODUCTION

43 The hexanucleotide GGGGCC repeat expansion in the first intron of *C9ORF72* is the most common  
44 monogenic cause of inherited amyotrophic lateral sclerosis (ALS) and frontotemporal dementia (FTD)  
45 <sup>1,2</sup>. This mutation is thought to cause ALS/FTD via three non-mutually exclusive mechanisms: (1)  
46 loss-of-function due to reduced C9ORF72 protein expression, toxicity from repeat-containing sense  
47 (GGGGCC) and antisense (CCCCGG) RNA<sup>3,4</sup>, and (3) toxicity from dipeptide repeat (DPR) proteins  
48 produced from these transcripts<sup>5</sup>. DPRs produced from both sense (poly-GA, poly-GP, poly-GR) and  
49 antisense (poly-PR, poly-PG, poly-PA) transcripts are present in the central nervous system of  
50 ALS/FTD patients<sup>6,7</sup>. Strong evidence from experimental model systems suggests DPRs are toxic<sup>8</sup>,  
51 underscoring the importance of uncovering the molecular mechanisms responsible for DPR synthesis.

52 To design therapies that reduce DPR levels, it is valuable to identify initiation codons used in  
53 DPR translation. To date, the synthesis of sense DPRs has been a major focus in the ALS/FTD field,  
54 resulting in the identification of translation initiation codons for poly-GA and poly-GR<sup>9,10,11,12</sup>. As  
55 previously shown, *non-canonical* codons (viz., CUG for poly-GA, AGG for poly-GR) initiate DPR  
56 synthesis from the sense strand, suggesting an unconventional form of translation, i.e., repeat-  
57 associated non-AUG (RAN) translation<sup>6</sup>. However, deletion analysis of *cis*-regulatory elements  
58 upstream of the GGGGCC repeats and ribosome profiling revealed that translation of the poly-GA and  
59 poly-GR frames is independent of the presence of G<sub>4</sub>C<sub>2</sub> repeats<sup>13,14,15</sup>. Moreover, a recent study  
60 reported that a canonical AUG initiation codon (194 nucleotides upstream of the repeat) is used for  
61 poly-PG synthesis from the antisense CCCCCG transcript, suggesting conventional translation is  
62 involved in the synthesis of at least one DPR. Despite the latter finding, the initiation codon for other  
63 DPRs (e.g., poly-PR) from the antisense transcript remains unknown. Hence, it is unclear which form  
64 of translation (RAN vs. conventional) is utilized for DPR synthesis from the antisense transcript.  
65 Studying the mechanisms responsible for DPR synthesis from the antisense transcript is important  
66 because a recent ALS clinical trial that specifically targeted the production of sense DPRs failed. In the

67 latter case, no improvements in clinical outcomes occurred despite decreased levels of sense DPRs<sup>16</sup>,  
68 <sup>17</sup>.

69 An additional challenge in ALS/FTD is the identification of regulatory factors necessary for  
70 DPR synthesis. Research efforts have uncovered a number of proteins that act at different steps of DPR  
71 synthesis: RNA helicase eIF4A<sup>9</sup>, cap-binding initiating factor eIF4E<sup>18</sup>, small ribosomal protein subunit  
72 25 (RPS25)<sup>19</sup>, eukaryotic translation initiation factors eIF2A<sup>12</sup>, eIF3F<sup>20</sup>, eIF2D<sup>21</sup>, and eIF2D co-factors  
73 DENR and MCTS-1<sup>22</sup>. Except for RPS25, all remaining factors have only been assessed for their  
74 effects on DPRs produced from the sense GGGGCC transcript. Hence, it remains unknown whether  
75 any of these factors is used for DPR synthesis from the antisense transcript. Furthermore, the role of  
76 these factors on DPR synthesis in induced pluripotent stem cell (iPSC)-derived neurons from  
77 *C9ORF72* ALS/FTD patients remains largely untested.

78 Here, we employ cell-based models of *C9ORF72* to identify translation initiation codons for  
79 DPRs produced from the antisense transcript. We find that a canonical AUG initiation codon located  
80 273 base pairs (-273 bp) upstream of the CCCCCG repeats is necessary for poly-PR synthesis.  
81 Furthermore, we provide evidence for redundancy in usage of canonical initiation codons for poly-PG  
82 synthesis, as follows. Although an AUG at -194 bp is the main start codon for poly-PG, two other  
83 AUG codons (at -212 bp and at -113 bp) can also function as translation initiation sites. These findings  
84 suggest that DPR synthesis from the antisense transcript occurs via AUG dependent translation,  
85 contrasting with the DPR synthesis from the sense transcript, which depends on near-cognate start  
86 codons (CUG for poly-GA, AGG for poly-GR). Furthermore, we critically extend previous  
87 observations made in *C. elegans* and cell-based models<sup>21</sup> by demonstrating that translation initiation  
88 factor eIF2D is necessary for CUG-dependent poly-GA synthesis from the sense transcript in iPSC-  
89 derived motor neurons from *C9ORF72*-ALS/FTD patients. However, eIF2D is not involved in AUG-  
90 dependent antisense DPR (poly-PG, poly-PR) synthesis, suggesting that translation initiation sites and  
91 factors for DPR synthesis from sense GGGGCC and antisense CCCCCG transcripts are distinct.

92 **RESULTS**

93

94 **A canonical AUG initiation codon located 273 bp upstream of CCCC GG repeats is required for**  
95 **poly-PR synthesis**

96 To study DPR synthesis from the antisense transcript, we engineered three constructs with 35  
97 CCCC GG repeats preceded by 1000bp-long intronic sequence from human *C9ORF72* (**Fig. 1 A**)<sup>21</sup>,  
98 and then followed by nanoluciferase (NanoLuc) in frame of poly-PR, poly-PG, or poly-PA (see  
99 Materials and Methods). Upon transfection into HEK293 or NSC34 cells, robust expression of poly-  
100 PR and poly-PG, but not poly-PA, was present in luciferase assays (**Fig. 1B-C**) and Western blots (**Fig.**  
101 **1D-E**). These poly-PR::NanoLuc and poly-PG::NanoLuc constructs offer an opportunity to identify the  
102 initiation codons for poly-PR and poly-PG synthesis.

103 We initially focused on poly-PR, one of the most toxic DPRs based on *in vitro*<sup>23, 24, 25</sup> and *in*  
104 *vivo* studies in worms<sup>26</sup>, flies<sup>23, 27, 28</sup> and mice<sup>28, 29, 30</sup>. Using our recently developed machine-learning  
105 algorithm for initiation codon prediction<sup>31</sup>, we identified a CUG at -366bp (Kozak sequence:  
106 guaCUGa) and an AUG at -273bp (Kozak sequence: cggAUGc) as putative initiation codons for poly-  
107 PR (**Fig. 1F**). We then mutated these codons either to CCC or the termination codon UAG (**Fig. 1F**).  
108 Western blotting and luciferase assay showed that mutation of the CUG at -366bp to CCC or UAG did  
109 not affect poly-PR expression (**Fig. 1G-J**). However, mutation of the AUG at -273bp to CCC or UAG  
110 completely abolished poly-PR expression both in HEK293 and NSC34 cells (**Fig. 1G-J**). These results  
111 strongly suggest that AUG at -273bp is the start codon for poly-PR. Of note, a previous study also  
112 detected poly-PR synthesis when only 100 bp of intronic sequence downstream of the GGGGCC  
113 repeats was cloned in an adeno-associated viral vector<sup>32</sup>. Although the intronic sequence was only 100  
114 bp-long, it was located next to a 589 bp regulatory element of the woodchuck hepatitis virus (WPRE)  
115 that contains several putative start codons for poly-PR synthesis.

116

117

## 118 Evidence for redundancy of AUG initiation codon usage in poly-PG translation

119 We next investigated poly-PG, which is less toxic than poly-PR<sup>23, 27, 33, 34</sup>, and has been proposed as a  
120 biomarker for *C9ORF72*-ALS/FTD<sup>35, 36</sup>. Using the same machine-learning algorithm<sup>31</sup>, we identified  
121 four putative initiation codons (AUG at -212bp, AUG at -194bp, CUG at -182bp, AUG at -113bp)  
122 (**Fig. 2A**), all with relatively good Kozak sequences (gaaAUGa at -212bp, aaaAUGc at -194bp,  
123 gctCUGa at -182bp, aggAUGc at -113bp). Of note, a prior publication previously identified the AUG  
124 at -194bp as an initiation codon<sup>11</sup>. Mutation of all four of these codons to CCC completely blocked  
125 poly-PG expression (**Fig. 2B-D**), suggesting one or more of these codons is required. Next, we  
126 simultaneously mutated three codons to CCC, but left intact the AUG at -212bp. As a result of this  
127 change, we observed poly-PG expression, suggesting poly-PG translation can start at the AUG at -  
128 212bp. Intriguingly, when we followed a similar approach to mutate 3 codons to CCC but leave intact  
129 the AUG at -194bp or at -113bp, we also observed poly-PG production, but this time at an expected  
130 lower molecular weight (**Fig. 2B-D**). Of note, when we mutated to CCC all three AUG codons (-  
131 212bp, -194bp, -113bp) but left intact the CUG at -182bp, we observed no poly-PG expression (**Fig.**  
132 **2B-D**). These results suggest that any of these three AUGs, but not the CUG at -182bp, can function as  
133 a start codon for poly-PG, indicating redundancy in the translation initiation codon for poly-PG.

134 We observed a strong (higher molecular weight) band and a fainter (lower molecular weight)  
135 band for poly-PG when the intact version of the poly-PG::NanoLuc plasmid was translated (**Fig. 2B**).  
136 The strong band is likely to result from translation initiation at the AUG at -194bp, whereas the faint  
137 band is likely initiated at the AUG at -113bp (**Fig. 2B**). Hence, the AUG at -194bp appears to be the  
138 main initiation codon for poly-PG synthesis from the antisense transcript of 35 C4G2 repeats (**Fig.**  
139 **2B**), which is consistent with mass-spectrometry results from a previous report<sup>11</sup>. Of note, selective  
140 mutation of the AUG at -194 to CCC did not abolish poly-PG expression (**Fig. 3A-D**). Instead, it led to  
141 the production of two poly-PG products: a high molecular weight product (strong band) resulting from  
142 use of the AUG at -212bp as well as a lower molecular weight product (faint band) resulting from

143 AUG at -113bp (**Fig. 3B**). Altogether, these results suggest that the AUG at -194bp is mainly used for  
144 poly-PG expression from antisense C4G2 repeats. However, when this AUG is mutated, two other  
145 AUG codons (at -212bp and -113bp) can also function as translation initiation sites, again revealing  
146 redundancy in the start codon usage for poly-PG synthesis.

147 We further corroborated redundant initiation for poly-PG translation by separately mutating  
148 each of the AUG codons to a termination UAG codon (**Fig. 4A-D**). Mutation of the AUG at -212bp to  
149 UAG failed to affect poly-PG expression, most likely because the AUG at -194bp became the start  
150 codon as shown by Western blots (**Fig. 4B-D**). Similarly, mutation of the AUG at -194bp to UAG did  
151 not affect poly-PG expression because the AUG at -113bp became the start codon (**Fig. 4B-D**).  
152 However, mutation of AUG at -113bp to UAG completely blocked poly-PG expression (**Fig. 4B-D**).  
153 Altogether, these findings strongly suggest that the AUG at -194bp is primarily used for poly-GP  
154 translation, but the other two AUG codons at -212bp and -113bp can also function as translation  
155 initiation sites under certain experimental conditions.

156

### 157 **Knockdown of eIF2D does not affect poly-PG synthesis but reduces poly-GA in iPSC-derived** 158 **motor neurons**

159 Following the identification of AUG codons for translation initiation of poly-PG, we next sought to  
160 identify translation initiation factors necessary for this DPR synthesis. We focused on eIF2D, since we  
161 had previously found it to be necessary for poly-GA synthesis from the sense transcript in *C. elegans*  
162 and cell-based models (HEK293 and NSC34 cell lines)<sup>21</sup>. To test whether eIF2D has a role in poly-PG  
163 translation, we used a published iPSC line from a *C9ORF72* carrier, as well as its isogenic control line  
164 which had CRISPR/Cas9-mediated deletion of expanded GGGGCC repeats<sup>37</sup>. The iPSC lines were  
165 differentiated into motor neurons as previously described<sup>38</sup>. Repeated transfection of a small  
166 interfering RNA (siRNA) against eIF2D, but not a control scrambled siRNA, resulted in robust  
167 downregulation of *eIF2D* mRNA as assessed by RT-PCR (**Fig. 5A**). The mRNA levels of eIF2A, a

168 related initiation factor, remained unaltered, suggesting specificity in the siRNA effect. Despite this  
169 knockdown, an immunoassay failed to show any differences in the steady-state levels of poly-PG (**Fig.**  
170 **5B**), suggesting eIF2D is not necessary for poly-PG translation from the antisense transcript. Although  
171 this assay does not distinguish between poly-PG produced from the antisense transcript and poly-GP  
172 from the sense transcript, PG/GP inclusions in brain tissue of *C9ORF72* ALS/FTD patients contain  
173 ~80% of poly-PG from the antisense transcript and ~20% of poly-GP from the sense transcript<sup>6</sup>.  
174 Hence, our data suggest that eIF2D does not affect poly-PG synthesis from the antisense CCCC GG  
175 transcript.

176         Despite the above findings, eIF2D knockdown significantly affects poly-GA synthesis from the  
177 sense GGGGCC transcript in iPSC-derived neurons, critically extending previous observations made  
178 in *C. elegans* and cell-based models<sup>21</sup> (**Fig. 5B**). Consistent with the latter study, eIF2D knockdown  
179 had no effect on poly-GR synthesis from the sense transcript (**Fig. 5B**). Altogether, these findings  
180 suggest that eIF2D is required for CUG start codon dependent poly-GA synthesis from the sense  
181 transcript in human iPSC-derived neurons, but is dispensable for poly-GR and poly-PG synthesis from  
182 sense and antisense transcripts, respectively.

183

#### 184 **eIF2D does not control poly-PR and poly-PG synthesis from the antisense transcript**

185 Since immunoassays to measure poly-PR steady-state levels in human iPSC-derived neurons are not  
186 yet established, we transfected the poly-PR::NanoLuc reporter construct into HEK293 in order to  
187 evaluate the effect of eIF2D in poly-PR synthesis. To this end, we generated an *EIF2D* knockout  
188 HEK293 line using CRISPR/Cas9 gene editing (see Materials and Methods), and then performed a  
189 luciferase assay to measure poly-PR::NanoLuc expression (**Fig. 6A-B**). We found that knockout of  
190 *EIF2D* did not affect the expression levels of poly-PR (**Fig. 6C**). Importantly, we obtained similar  
191 results upon knockdown of *EIF2D* with a short hairpin RNA (shRNA) (**Fig. 6D**), again suggesting that  
192 eIF2D is not required for poly-PR synthesis from antisense CCCC GG transcripts. Lastly, knock-out



193 (CRISPR/Cas9) or knock-down (shRNA) of *eIF2D* in HEK293 cells had no effect on poly-  
194 PG::NanoLuc reporter expression (**Fig. 6C-D**), corroborating our findings in human iPSC-derived  
195 neurons (**Fig. 5**).

196

## 197 **DISCUSSION**

198 Here, we show that canonical AUG codons on the antisense CCCCCG transcript serve as translation  
199 initiation codons for two DPRs, viz., poly-PR and poly-PG. This finding may inform the design of  
200 future therapy for ALS/FTD, especially since poly-PR is a highly toxic DPR and poly-PG synthesis is  
201 primarily translated from the antisense transcript<sup>6</sup>. Our finding of canonical AUG codons serving as  
202 translation initiation codons for antisense DPRs (poly-PR, poly-PG) differs from the proposed mode of  
203 translation of sense DPRs (poly-GA, poly-GR). In the latter case, it is thought that repeat-associated  
204 non-AUG (RAN) translation of poly-GA and poly-GR occurs via non-canonical CUG and AGG  
205 codons, respectively<sup>9, 10, 11, 12, 14, 21</sup>. However, this model of RAN translation for poly-GA and poly-GR  
206 has been recently challenged, as translation of these DPRs does not depend on the presence of  
207 GGGGCC repeats<sup>13, 14, 15, 21</sup>. Nevertheless, our findings merged with those of previous studies suggest  
208 that DPR synthesis involves at least two different modes of translation: near-cognate start codon (e.g.,  
209 CUG, AGG) dependent translation for poly-GA and poly-GR from sense GGGGCC transcripts, as  
210 well as conventional AUG dependent translation for poly-PR and poly-PG synthesis from antisense  
211 CCCCCG transcripts.

212 A notable finding of the present study is the presence of redundancy in start codon usage for  
213 poly-PG synthesis under specific experimental conditions. Our findings suggest that the AUG at -  
214 194bp is primarily used for poly-GP translation from antisense CCCCCG transcripts, consistent with a  
215 previous investigation<sup>11</sup>. However, when this AUG is mutated<sup>11</sup>, two other canonical AUG codons (at -  
216 212bp and -113bp can also function as translation initiation sites under certain experimental  
217 conditions. Although it remains unknown whether such redundancy of translation initiation occurs in  
218 the central nervous system of *C9ORF72* ALS/FTD patients, these findings nevertheless suggest that  
219 targeting only one translation initiation site may be insufficient to prevent poly-PG synthesis. We note  
220 that redundancy in start codon usage may also apply to poly-PR synthesis from the antisense transcript:  
221 although we identified an AUG at -273 bp as necessary for poly-PR synthesis, a previous study

222 detected poly-PR when only 100bp downstream of the GGGGCC repeats were included in an adeno-  
223 associated viral vector<sup>32</sup>.

224 Emerging evidence suggests distinct mechanisms affect translation initiation of DPRs from  
225 sense and antisense transcripts in *C9ORF72* ALS/FTD. For example, the RNA helicase DDX3X  
226 directly binds to sense (GGGGCC), but not antisense (CCCCGG) transcripts, thereby selectively  
227 repressing the production of sense DPRs (poly-GA, poly-GP, poly-GR)<sup>39</sup>. Further, the accessory  
228 proteins eIF4B and eIF4H interact directly with sense GGGGCC transcripts and are required for poly-  
229 GR synthesis in a *Drosophila* model of *C9ORF72* ALS/FTD<sup>40</sup>. Here, we provide evidence that the  
230 translation initiation factor eIF2D is not involved in DPR (viz., poly-PG, poly-PR) synthesis from  
231 antisense (CCCCGG) transcripts, but is selectively required for poly-GA production from sense  
232 (GGGGCC) transcripts in human iPSC-derived motor neurons. The latter findings are important  
233 because they indicate that distinct initiation sites and factors are involved in DPR translation from  
234 sense and antisense transcripts, perhaps a reflection of the different modes of translation (RAN- and  
235 AUG-dependent translation) of DPRs. Consistent with the idea of distinct factors being involved,  
236 translation initiation is the most heavily regulated step in protein synthesis because it is the rate-  
237 limiting step of this process<sup>41</sup>. In contrast to the different mechanisms responsible for DPR translation,  
238 the transcriptional control of sense and antisense transcripts appears coordinated. For example, a single  
239 protein – the transcription elongation factor Spt4 – controls production of both sense and antisense  
240 transcripts<sup>42</sup>.

241 In addition to *C9ORF72*-ALS/FTD, nucleotide repeat expansions are present in various genes,  
242 causing more than 30 neurogenetic diseases<sup>43,44</sup>. In many of these disorders, products translated from  
243 the expanded repeat sequences have been detected in the nervous system of affected individuals. The  
244 findings of the present study may also apply to this large group of genetic disorders in the following  
245 ways. First, translation of peptides from the same nucleotide repeat expansion may require different  
246 modes of translation (RAN- and AUG-dependent translation), as previously proposed<sup>45</sup>. Second, the

247 surprising redundancy in canonical AUG codon usage for poly-PG may also apply to proteins  
248 translated from nucleotide repeat expansions in other genes, as the number of nucleotide repeats is  
249 often variable in different neural cells of the same patient. Lastly, our results support the idea that  
250 distinct translation initiation factors are involved in the synthesis of individual DPRs produced from  
251 the same nucleotide repeat expansion. This finding suggests that the design of therapies for diseases  
252 caused by expanded nucleotide repeats may be especially challenging.

253

254 |

255 **Acknowledgements**

256  
257 This work was supported by a grant from the Lohengrin Foundation (R.P.R, P.K), a basic science pilot  
258 grant from the Association for Frontotemporal Degeneration (AFTD) (R.P.R, P.K), and two NIH  
259 grants (R37NS057553 and R01NS101986) to F.B.G. The antibodies used to measure GA levels were  
260 discovered by Neurimmune AG (Zurich, Switzerland)”.

261

262

263 **Author Contributions**

264 Study design: Y.S., R.P.R., P.K. Literature search: Y.S., R.P.R., P.K. Experimental studies: Y.S., S.L.,  
265 G.K., Y.G., D.Y.K. Data analysis/interpretation: Y.S., S.L., G.K., Y.G., D.Y.K. Statistical analysis:  
266 Y.S., Funding acquisition: F.B.G., R.P.R., P.K. Manuscript preparation – Original draft, review,  
267 editing: Y.S., F.B.G., R.P.R., P.K.

268

269

270 **Competing Interests**

271

272 The authors declare no competing interests.

273

274

275

## 276 **Materials and Methods**

277

### 278 **Generation of the plasmid constructs**

279 All oligonucleotides were obtained from Integrated DNA Technologies. Oligonucleotide I-F/R  
280 (Supplementary file 1) contains part of a *HindIII* site followed by 113 nucleotides that are  
281 normally upstream of the G<sub>4</sub>C<sub>2</sub> repeats and then by three G<sub>4</sub>C<sub>2</sub> repeats. Oligonucleotide II-F/R  
282 contains 10 G<sub>4</sub>C<sub>2</sub> repeats followed by part of a *NotI* site. These two oligonucleotides were  
283 phosphorylated, annealed, and then ligated into restriction sites of *HindIII* and *NotI* of a pAG plasmid.  
284 The plasmid was then digested with *HindIII* and *BamHI*. The *HindIII-BamHI* fragment was digested  
285 with *BanII*, and the resultant *HindIII-BanII* fragment was then ligated with oligonucleotide II-F/R into  
286 the pAG plasmid. This approach was repeated three times with similar digestions and ligations of  
287 oligonucleotide II. Finally, the *HindIII-BanII* fragment was ligated with oligonucleotide III-F/R (which  
288 contains 2 G<sub>4</sub>C<sub>2</sub> repeats followed by a 99 bp flanking sequence and then followed by part of the *NotI*  
289 site) into the pAG plasmid (referred to as 113bp-35RG4C2-99bp plasmid). To delete stop codons after  
290 the C<sub>4</sub>G<sub>2</sub> repeats, the plasmid was treated with *BfaI* and *NotI*, and the digested fragment was ligated  
291 with oligonucleotide IV-F/R. To add sequence upstream from the C<sub>4</sub>G<sub>2</sub> repeats, a 543 bp portion  
292 (408-950 of NCBI reference sequence, NC\_000009.12) of the *C9ORF72* gene from HEK293 genomic  
293 DNA was amplified by PCR using the primer shown in Supplementary file 1. The amplified construct  
294 was then ligated with the *BtgI/NotI*-digested fragment of the 113bp-35RG4C2-99bp plasmid into *XbaI*  
295 and *NotI* sites of pcDNA6/V5-His A plasmid (referred to as 609bp-35RC4G2 plasmid). To further  
296 increase the length of sequence upstream from C<sub>4</sub>G<sub>2</sub> repeats, a 392 bp portion (951-1342 of NCBI  
297 reference sequence, NC\_000009.12) of *C9ORF72* gene from HEK293 genomic DNA was amplified  
298 by PCR using the primer shown in Supplementary file 1. The amplified construct was then ligated with  
299 the *XbaI/NotI* fragment of 609bp-35RC4G2 plasmid into *HindIII* and *NotI* sites of the pAG plasmid  
300 (referred to as AS-C9 plasmid). The  $\Delta$ C9 plasmid<sup>21</sup> was generated as previously described.

301 To mutate sequences, a 560bp portion upstream from the repeats in the AS-C9 plasmid was  
302 amplified by PCR using a primer shown in Supplementary file 1. The amplified portion was then  
303 ligated into the HindIII and NotI sites of pcDNA6/V5-His A plasmid. Mutations were made with Q5<sup>®</sup>  
304 Site-Directed Mutagenesis Kit (New England Biolabs) using primer sets (Supplementary file 1). The  
305 StuI/BtgI portion of the resultant mutants was then cloned back into the StuI and NotI sites of AS-C9  
306 plasmid with BtgI/NotI portion of AS-C9 plasmid using the primer sets in Supplementary file 1.

307

### 308 **Cell culture**

309 HEK293 and NSC34 cells were cultured in DMEM supplemented with 10% FBS, 2 mM L-Glutamine,  
310 100 U/ml Penicillin and 100 µg/ml Streptomycin.

311

### 312 **Luciferase Assay**

313 The cells were plated in 24-well plates at  $5 \times 10^4$  per well and then cotransfected using Lipofectamine  
314 LTX (Thermo Fisher Scientific) with 100 ng of the plasmid along with 100 ng fLuc plasmid as a  
315 transfection control. After 48h, the cells were lysed with  $1 \times$  passive lysis buffer (Promega). Levels of  
316 nLuc and fLuc were assessed with the Nano-Glo Dual-Luciferase Reporter assay system (Promega)  
317 and a Wallac 1420 VICTOR 3V luminometer (Perkin Elmer) according to the manufacturer's protocol.

318

### 319 **Western blotting**

320 The cells were plated in 6-well plates at  $2 \times 10^5$  per well and then cotransfected with 2.5 µg of  
321 plasmids using Lipofectamine LTX (ThermoFisher Scientific). After 48h, cell lysates were prepared  
322 using RIPA buffer (50 mM Tris-HCl, pH 7.5; 150 mM NaCl; 0.1% SDS; 0.5% sodium deoxycholate; 5  
323 mM EDTA containing  $1 \times$  Halt<sup>™</sup> Protease inhibitor Cocktail). Lysates were subjected to  
324 electrophoresis on Mini-PROTEAN TGX Gels (BIO-RAD), and then transferred to Amersham  
325 Hybond P 0.45 µm PVDF membranes (GE Healthcare). The membrane was blocked with 5% non-fat

326 skim milk in Tris-buffered saline containing 0.05% Tween-20 for 1 h at room temperature, and then  
327 incubated overnight at 4 °C with primary antibodies against poly-PR (1:1000, ABN1354, EMD  
328 Millipore), poly-GP (1:1000, TALS 828.179, Target ALS), eIF2D (1:1000, 12840-1-AP, Proteintech)  
329 and  $\alpha$ -tubulin (1:5000, YL1/2, Abcam). Following washing, the membrane was incubated for 1 h at  
330 room temperature with anti-mouse (1:5000, GE Healthcare), anti-rabbit (1:5000, GE Healthcare), or  
331 anti-rat horseradish peroxidase–conjugated secondary antibodies (1:1000, Cell Signaling Technology).  
332 The signal was detected using SuperSignal West Dura Extended Duration Substrate (ThermoFisher  
333 Scientific) and analyzed using ChemiDoc MP Imaging System and Image Lab software (version 6.0.1,  
334 Bio-Rad).

335

### 336 **Generation of *EIF2D* knockout cells by CRISPR/Cas9 gene editing**

337 A single guide RNA (sgRNA) (GCAGTGACTGTGTACGTGAG) that targets exon 2 of eIF2D was  
338 cloned into lentiCRISPR v2 plasmid (Addgene). HEK293 cells were plated into 6-well plates at  
339  $4 \times 10^5$  cells per well, and then transfected using Lipofectamine LTX with 2.5  $\mu$ g lentiCRISPR v2  
340 plasmids containing the sgRNA sequence. Transfected cells were selected using 3  $\mu$ g/ml puromycin for  
341 3 days. *EIF2D* knockout cell clones were obtained by limited dilution. The resulting *EIF2D* knockout  
342 cells carry allele-specific mutations, as follows. Compared to the WT

343 GGATGCAGTGACTGTGTACGTGAGTGGTGG sequence, one allele

344 GGATGCAGTGACTGTGTACG**TT**GAGTGGTGG has a single nucleotide insertion shown bolded

345 while the other allele contains a two-nucleotide deletion GGATGCAGTGACTGTGTA—

346 TGAGTGGTGG. Both alleles lead to a premature stop codon, likely resulting in two different

347 truncated eIF2D proteins with the following respective sequence:

348 MFAKAFRVKSNTAIKGSRRKLRADVTTAFPTLGTDQVSELVPGKEELNIVKLYAHKGDVAVT

349 VYVEWW and MFAKAFRVKSNTAIKGSRRKLRADVTTAFPTLGTDQVSELVPGKEELNIVKLY

350 AHKGDVAVTVYVEWW.



### 351 **Knockdown of eIF2D in HEK293 cells**

352 shRNA plasmids against human eIF2D were prepared using previously published methods<sup>21</sup>. In brief,  
353 oligonucleotides with an siRNA sequence were cloned into the *Bam*HI and *Hind*III sites of p*Silencer*  
354 2.1-U6 neo Vector (ThermoFisher Scientific) according to the manufacturer's protocol. The latter kit  
355 also contained a control shRNA vector. For luciferase assays (shown above), the cells were plated in  
356 24-well plates at  $5 \times 10^4$  per well and cotransfected with 50 ng of the AS-C9 plasmids and 50 ng of the  
357 fLuc plasmids along with 500 ng of either control shRNA or anti-eIF2D shRNA using Lipofectamine  
358 LTX (ThermoFisher Scientific).

359

### 360 **Motor Neuron Differentiation from human iPSC lines**

361 Human motor neurons were differentiated as previously described from a published iPSC line obtained  
362 from a *C9ORF72* carrier (FTD26-6), as well as an isogenic control line that had a CRISPR/Cas9-  
363 mediated deletion of expanded GGGGCC repeats<sup>37,38</sup>. Briefly, iPSCs were plated and expanded in  
364 mTSE1 medium (Stem Cell Technologies) in Matrigel-coated wells. Twenty-four hours after plating,  
365 the culture medium was replaced every other day with neuroepithelial progenitor (NEP) medium,  
366 DMEM/F12 (Gibco), neurobasal medium (Gibco) at 1:1, 0.5X N2 (Gibco), 0.5X B27 (Gibco), 0.1 mM  
367 ascorbic acid (Sigma), 1X Glutamax (Invitrogen), 3  $\mu$ M CHIR99021 (Tocris Bioscience), 2  $\mu$ M DMH1  
368 (Tocris Bioscience), and 2  $\mu$ M SB431542 (Stemgent) for 6 days. NEPs were dissociated with accutase,  
369 split 1:6 into Matrigel-coated wells, and then cultured for 6 days in motor neuron progenitor induction  
370 medium (NEP with 0.1  $\mu$ M retinoic acid and 0.5  $\mu$ M purmorphamine, both from Stemgent). Motor  
371 neuron progenitors were dissociated with accutase to generate suspension cultures, and the cells were  
372 cultured in motor neuron differentiation medium (NEP with 0.5  $\mu$ M retinoic acid and 0.1  $\mu$ M  
373 purmorphamine). After 6 days, the cultures were dissociated into single cells, and seeded on Matrigel-  
374 coated plates in motor neuron medium, 0.5X B27 supplement, 0.1 mM ascorbic acid, 1X Glutamax,  
375 0.1  $\mu$ M Compound E (Calbiochem), 0.26  $\mu$ g/ml cAMP, 1  $\mu$ g/ml Laminin (Sigma), 10 ng/ml GDNF

376 (R&D Systems), and 10 ng/ml GDNF (R&D Systems), and 10 ng/ml BDNF. Motor neurons were  
377 cultured for 5 weeks.

### 378 **SiRNA Knockdown**

379 After 3 weeks in neuron culture media, motor neurons were transfected with a siRNA specific to  
380 *eIF2D* mRNA or a scrambled control. For the transfection, lipofectamine RNAiMAX (ThermoFisher  
381 Scientific) was first diluted in Opti-MEM medium, and then both *eIF2D* and scrambled control  
382 siRNAs were separately diluted in Opti-MEM medium at room temperature. Diluted siRNA and  
383 diluted lipofectamine RNAiMAX (1:1 ratio) were then mixed and incubated for 20 min. The siRNA-  
384 lipid complex solution was then brought up to the appropriate volume with MN culture medium. The  
385 culture medium in the plate was aspirated and replaced with a siRNA-lipid complex at a final  
386 concentration of 60 pmol siRNA in 1.5 ml medium per 1,000,000 cells. After 24 hours, the medium  
387 was replaced with a normal motor neuron medium. This process was repeated two more times at 26  
388 and 31 days in culture. After 36 days in culture, we measured siRNA efficiency and levels of DPRs in  
389 harvested motor neurons.

### 390 **RNA Extraction and Quantitative Real-time PCR**

391 Total RNA from iPSC-derived motor neurons was extracted with the RNeasy Mini Kit (Qiagen) and  
392 then reverse transcribed to cDNA with the TaqMan Reverse Transcription Kit (Applied Biosystems).  
393 Quantitative PCR was carried out with SYBR Green Master Mix (Applied Biosystems). Using primers  
394 listed in SI Appendix, Table, Ct values for each gene were normalized to actin and GAPDH. Relative  
395 mRNA expression was calculated with the double delta Ct method.

396

### 397 **Poly-GR and Poly-GP measurement in iPSC-derived neurons**

398 DPR levels in iPSC-derived neurons were detected using the Meso Scale Discovery (MSD)  
399 Immunoassay platform as previously reported<sup>17</sup>. In brief, cells were lysed using Tris based lysis buffer,  
400 and lysates were adjusted to equal concentrations and loaded in duplicate wells. Background subtracted  
401 electrochemiluminescence (ECL) signals were presented as percentage.

#### 402 **Soluble and insoluble fractionation for measurement of poly-GA**

403 Motor neurons were lysed in RIPA buffer (Boston BioProducts, BP-115D) with protease and  
404 phosphatase inhibitors. The lysates were rotated for 30 min at 4 C, followed by centrifugation at  
405 13,500 rpm for 20 min. The supernatant was removed and used as the soluble fraction. Protein  
406 concentrations of the soluble fraction were determined by the BCA assay (Thermo Fisher Scientific,  
407 Cat # 23227). To remove carryovers, the pellets were washed with RIPA buffer, and then resuspended  
408 in the same buffer with 2% SDS followed by sonication on ice. The lysates were rotated for 30 min at  
409 4C, then spun at 14,800 rpm for 20 min at 4C. The supernatant was removed and used as insoluble  
410 fraction. Protein concentrations of the insoluble fraction were determined by Pierce™ 660 nm Protein  
411 Assay (Thermo Fisher Scientific, 22660).

#### 412 413 **Measurement of poly-GA in iPSC-derived neurons**

414 Poly-GA in soluble and insoluble motor neuron lysates was measured using a Meso Scale Discovery  
415 sandwich immunoassay. A human/murine chimeric form of anti-GA antibody chGA3 was used for  
416 capture, and a human anti-GA antibody GA4 with a SULFO-tagged anti-human secondary antibody  
417 was used for detection. Poly-GA concentrations were interpolated from the standard curve using 60X-  
418 GA expressed in HEK 293 cells and presented as percentage. For background correction, values from  
419 no-repeats neuron samples were subtracted from the corresponding test samples.

#### 420 **Statistical analysis**

421 Statistical analysis was performed by one-way ANOVA with Tukey's multiple comparison test and  
422 two-way ANOVA with the Šídák multiple comparison test using GraphPad Prism version 9.3.1. A *P*-  
423 value of <0.05 was considered significant. The data are presented as mean ± standard error of the  
424 mean.  
425

426 **References**

- 427
- 428 1. DeJesus-Hernandez, M. et al. Expanded GGGGCC hexanucleotide repeat in noncoding region  
429 of C9ORF72 causes chromosome 9p-linked FTD and ALS. *Neuron* **72**, 245-256 (2011).
- 430
- 431 2. Renton, A. E. et al. A hexanucleotide repeat expansion in C9ORF72 is the cause of  
432 chromosome 9p21-linked ALS-FTD. *Neuron* **72**, 257-268 (2011).
- 433
- 434 3. McEachin, Z. T., Parameswaran, J., Raj, N., Bassell, G. J. & Jiang, J. RNA-mediated toxicity in  
435 C9orf72 ALS and FTD. *Neurobiol Dis* **145**, 105055 (2020).
- 436
- 437 4. Parameswaran, J. et al. Antisense, but not sense, repeat expanded RNAs activate PKR/eIF2 $\alpha$ -  
438 dependent integrated stress response in C9orf72 FTD/ALS. *bioRxiv*, 2022.2006.2006.495030  
439 (2022).
- 440
- 441 5. Taylor, J. P., Brown Jr, R. H. & Cleveland, D. W. Decoding ALS: from genes to mechanism.  
442 *Nature* **539**, 197-206 (2016).
- 443
- 444 6. Zu, T. et al. RAN proteins and RNA foci from antisense transcripts in C9ORF72 ALS and  
445 frontotemporal dementia. *Proc Natl Acad Sci U S A* **110**, E4968-4977 (2013).
- 446
- 447 7. Gendron, T. F. et al. Antisense transcripts of the expanded C9ORF72 hexanucleotide repeat  
448 form nuclear RNA foci and undergo repeat-associated non-ATG translation in c9FTD/ALS.  
449 *Acta Neuropathol* **126**, 829-844 (2013).
- 450
- 451 8. Schmitz, A., Pinheiro Marques, J., Oertig, I., Maharjan, N. & Saxena, S. Emerging Perspectives  
452 on Dipeptide Repeat Proteins in C9ORF72 ALS/FTD. *Front Cell Neurosci* **15**, 637548 (2021).
- 453
- 454 9. Green, K. M. et al. RAN translation at C9orf72-associated repeat expansions is selectively  
455 enhanced by the integrated stress response. *Nat Commun* **8**, 2005 (2017).
- 456
- 457 10. Tabet, R. et al. CUG initiation and frameshifting enable production of dipeptide repeat proteins  
458 from ALS/FTD C9ORF72 transcripts. *Nat Commun* **9**, 152 (2018).
- 459
- 460 11. Boivin, M. et al. Reduced autophagy upon C9ORF72 loss synergizes with dipeptide repeat  
461 protein toxicity in G4C2 repeat expansion disorders. *EMBO J* **39**, e100574 (2020).
- 462
- 463 12. Sonobe, Y. et al. Translation of dipeptide repeat proteins from the C9ORF72 expanded repeat  
464 is associated with cellular stress. *Neurobiol Dis* **116**, 155-165 (2018).
- 465
- 466 13. Lampasona, A., Almeida, S. & Gao, F. B. Translation of the poly(GR) frame in C9ORF72-  
467 ALS/FTD is regulated by cis-elements involved in alternative splicing. *Neurobiol Aging* **105**,  
468 327-332 (2021).
- 469
- 470 14. van 't Spijker, H. M. et al. Ribosome profiling reveals novel regulation of C9ORF72 GGGGCC  
471 repeat-containing RNA translation. *RNA* **28**, 123-138 (2022).
- 472
- 473 15. Almeida, S. et al. Production of poly(GA) in C9ORF72 patient motor neurons derived from  
474 induced pluripotent stem cells. *Acta Neuropathol* **138**, 1099-1101 (2019).

- 475  
476 16. Tran, H. et al. Suppression of mutant C9orf72 expression by a potent mixed backbone antisense  
477 oligonucleotide. *Nat Med* **28**, 117-124 (2022).  
478  
479 17. Krishnan, G. et al. Poly(GR) and poly(GA) in cerebrospinal fluid as potential biomarkers for  
480 C9ORF72-ALS/FTD. *Nat Commun* **13**, 2799 (2022).  
481  
482 18. Cheng, W. et al. C9ORF72 GGGGCC repeat-associated non-AUG translation is upregulated by  
483 stress through eIF2 $\alpha$  phosphorylation. *Nat Commun* **9**, 51 (2018).  
484  
485 19. Yamada, S. B. et al. RPS25 is required for efficient RAN translation of C9orf72 and other  
486 neurodegenerative disease-associated nucleotide repeats. *Nat Neurosci* **22**, 1383-1388 (2019).  
487  
488 20. Ayhan, F. et al. SCA8 RAN polySer protein preferentially accumulates in white matter regions  
489 and is regulated by eIF3F. *EMBO J* **37**, (2018).  
490  
491 21. Sonobe, Y. et al. A *C. elegans* model of C9orf72-associated ALS/FTD uncovers a conserved  
492 role for eIF2D in RAN translation. *Nat Commun* **12**, 6025 (2021).  
493  
494 22. Green, K. M., Miller, S. L., Malik, I. & Todd, P. K. Non-canonical initiation factors modulate  
495 repeat-associated non-AUG translation. *Hum Mol Genet*, In print (2022).  
496  
497 23. Lee, K. H. et al. C9orf72 Dipeptide Repeats Impair the Assembly, Dynamics, and Function of  
498 Membrane-Less Organelles. *Cell* **167**, 774-788.e717 (2016).  
499  
500 24. Lin, Y. et al. Toxic PR Poly-Dipeptides Encoded by the C9orf72 Repeat Expansion Target LC  
501 Domain Polymers. *Cell* **167**, 789-802.e712 (2016).  
502  
503 25. Kwon, I. et al. Poly-dipeptides encoded by the C9orf72 repeats bind nucleoli, impede RNA  
504 biogenesis, and kill cells. *Science* **345**, 1139-1145 (2014).  
505  
506 26. Rudich, P. et al. Nuclear localized C9orf72-associated arginine-containing dipeptides exhibit  
507 age-dependent toxicity in *C. elegans*. *Hum Mol Genet* **26**, 4916-4928 (2017).  
508  
509 27. Wen, X. et al. Antisense proline-arginine RAN dipeptides linked to C9ORF72-ALS/FTD form  
510 toxic nuclear aggregates that initiate in vitro and in vivo neuronal death. *Neuron* **84**, 1213-1225  
511 (2014).  
512  
513 28. Maor-Nof, M. et al. p53 is a central regulator driving neurodegeneration caused by C9orf72  
514 poly(PR). *Cell* **184**, 689-708.e620 (2021).  
515  
516 29. Zhang, Y. J. et al. Heterochromatin anomalies and double-stranded RNA accumulation underlie  
517 C9orf72 poly(PR) toxicity. *Science* **363**, eaav2606 (2019).  
518  
519 30. Hao, Z. et al. Motor dysfunction and neurodegeneration in a C9orf72 mouse line expressing  
520 poly-PR. *Nat Commun* **10**, 2906 (2019).  
521

- 522 31. Gleason, A. C., Ghadge, G., Chen, J., Sonobe, Y. & Roos, R. P. Machine learning predicts  
523 translation initiation sites in neurologic diseases with nucleotide repeat expansions. *PLoS One*  
524 **17**, e0256411 (2022).  
525
- 526 32. Chew, J. et al. Aberrant deposition of stress granule-resident proteins linked to C9orf72-  
527 associated TDP-43 proteinopathy. *Mol Neurodegener* **14**, 9 (2019).  
528
- 529 33. Mizielinska, S. et al. C9orf72 repeat expansions cause neurodegeneration in Drosophila  
530 through arginine-rich proteins. *Science* **345**, 1192-1194 (2014).  
531
- 532 34. Freibaum, B. D. et al. GGGGCC repeat expansion in C9orf72 compromises nucleocytoplasmic  
533 transport. *Nature* **525**, 129-133 (2015).  
534
- 535 35. Gendron, T. F. et al. Poly(GP) proteins are a useful pharmacodynamic marker for C9ORF72-  
536 associated amyotrophic lateral sclerosis. *Sci Transl Med* **9**, eaai7866 (2017).  
537
- 538 36. Lehmer, C. et al. Poly-GP in cerebrospinal fluid links C9orf72-associated dipeptide repeat  
539 expression to the asymptomatic phase of ALS/FTD. *EMBO Mol Med* **9**, 859-868 (2017).  
540
- 541 37. Lopez-Gonzalez, R. et al. Partial inhibition of the overactivated Ku80-dependent DNA repair  
542 pathway rescues neurodegeneration in C9ORF72-ALS/FTD. *Proc Natl Acad Sci U S A* **116**,  
543 9628-9633 (2019).  
544
- 545 38. Lopez-Gonzalez, R. et al. Poly(GR) in C9ORF72-Related ALS/FTD Compromises  
546 Mitochondrial Function and Increases Oxidative Stress and DNA Damage in iPSC-Derived  
547 Motor Neurons. *Neuron* **92**, 383-391 (2016).  
548
- 549 39. Cheng, W. et al. CRISPR-Cas9 Screens Identify the RNA Helicase DDX3X as a Repressor of  
550 C9ORF72 (GGGGCC)<sub>n</sub> Repeat-Associated Non-AUG Translation. *Neuron* **104**, 885-898.e888  
551 (2019).  
552
- 553 40. Goodman, L. D. et al. eIF4B and eIF4H mediate GR production from expanded G4C2 in a  
554 Drosophila model for C9orf72-associated ALS. *Acta Neuropathol Commun* **7**, 62 (2019).  
555
- 556 41. Richter, J. D. & Sonenberg, N. Regulation of cap-dependent translation by eIF4E inhibitory  
557 proteins. *Nature* **433**, 477-480 (2005).  
558
- 559 42. Kramer, N. J. et al. Spt4 selectively regulates the expression of C9orf72 sense and antisense  
560 mutant transcripts. *Science* **353**, 708-712 (2016).  
561
- 562 43. Chintalaphani, S. R., Pineda, S. S., Deveson, I. W. & Kumar, K. R. An update on the  
563 neurological short tandem repeat expansion disorders and the emergence of long-read  
564 sequencing diagnostics. *Acta Neuropathol Commun* **9**, 98 (2021).  
565
- 566 44. Depienne, C. & Mandel, J. L. 30 years of repeat expansion disorders: What have we learned  
567 and what are the remaining challenges? *Am J Hum Genet* **108**, 764-785 (2021).  
568
- 569 45. Gao, F. B., Richter, J. D. & Cleveland, D. W. Rethinking Unconventional Translation in  
570 Neurodegeneration. *Cell* **171**, 994-1000 (2017).

571  
572  
573  
574  
575  
576  
577  
578  
579  
580  
581  
582  
583  
584  
585  
586  
587  
588  
589  
590  
591  
592  
593  
594  
595  
596  
597

## FIGURE LEGENDS

### **Figure 1. Poly-PR and poly-PG are translated from antisense CCCCCG repeats.**

(A) Schematic diagram of the constructs with 35 CCCCCG repeats preceded by 1000bp-long intronic sequence from human *C9ORF72*, and then followed by nanoluciferase (nLuc). (B-C) (B) HEK293 and (C) NSC34 cells were cotransfected with fLuc along with either  $\Delta$ C9 or AS-C9 plasmids. The levels of luciferase activity were assessed by dual luciferase assays (mean  $\pm$  s.e.m.). One-way ANOVA with Tukey's multiple comparison test was performed. (D-E) HEK293 and NSC34 cells were transfected with either  $\Delta$ C9 or AS-C9 plasmids. Cell lysates were processed for Western blotting, and immunostained with antibodies to (D) poly-PR, (E) poly-PG, and  $\alpha$ -tubulin. The experiments were repeated 4 times. (F) Schematic diagram showing the mutants of putative start codons for poly-PR. (G) HEK293 and NSC34 cells were transfected with the indicated plasmids. Cell lysates were processed for Western blotting, and immunostained with antibodies to poly-PR and  $\alpha$ -tubulin. (H-I) HEK293 and NSC34 cells were cotransfected with the plasmids along with fLuc. The level of luciferase activity was assessed by dual luciferase assays (mean  $\pm$  s.e.m.). One-way ANOVA with Tukey's multiple comparison test was performed. The experiments were repeated 4 times.

### **Figure 2. An AUG at -194bp position is the start codon for poly-PG translation.**

(A) Schematic diagram showing mutants with changes in the putative start codons for poly-PG. (B) HEK293 and NSC34 cells were transfected with indicated plasmids. Cell lysates were processed for Western blotting, and immunostained with antibodies to poly-PG and  $\alpha$ -tubulin. (C-D) (C) HEK293 and (D) NSC34 cells were cotransfected with fLuc plasmid along with other indicated plasmids. The level of luciferase activity was assessed by dual luciferase assay. One-way ANOVA with Tukey's multiple comparison test was performed. The experiments were repeated 4 times. mean  $\pm$  s.e.m.



598 **Figure 3. Mutation of AUG codons to CCC fails to suppress poly-PG translation.** (A) Schematic  
599 diagram of the constructs. (B) HEK293 and NSC34 cells were transfected with indicated plasmids.  
600 Cell lysates were processed for Western blotting, and immunostained with antibodies to poly-PG and  
601  $\alpha$ -tubulin. (C, D) (C) HEK293 and (D) NSC34 cells were cotransfected with fLuc plasmid along with  
602 indicated plasmids. The level of luciferase activity was assessed by dual luciferase assays. One-way  
603 ANOVA with Tukey's multiple comparison test was performed. The experiments were repeated 4  
604 times. mean  $\pm$  s.e.m.

605  
606 **Figure 4. Redundancy of start codon usage in poly-PG translation.** (A) Schematic diagram of the  
607 constructs. (B) HEK293 and NSC34 cells were transfected with indicated plasmids. Cell lysates were  
608 processed for Western blotting, and immunostained with antibodies to poly-PG and  $\alpha$ -tubulin. (C, D)  
609 (C) HEK293 and (D) NSC34 cells were cotransfected with fLuc plasmid along with indicated  
610 plasmids. The level of luciferase activity was assessed by dual luciferase assays. One-way ANOVA  
611 with Tukey's multiple comparison test was performed. The experiments were repeated 4 times. mean  $\pm$   
612 s.e.m.

613  
614 **Figure 5. Knockdown of eIF2D reduces poly-GA steady-state levels in human iPSC-derived**  
615 **neurons.** (A) The *eIF2D*, *eIF2A*, and *actin* mRNA levels were assessed by real-time quantitative PCR  
616 on either isogenic control or *C9ORF72* human motor neurons upon siRNA transfection (scramble or  
617 EIF2D siRNA). The *eIF2D* and *eIF2A* mRNA levels were normalized to actin. The experiments were  
618 repeated two times.  $P < 0.05$  by Two-tailed unpaired *t*-test. (B) Poly-GA, poly-GR and poly-GP levels  
619 in motor neurons differentiated independently (twice) from isogenic control and *C9ORF72* iPSC lines.  
620 DPR levels were measured using an MSD immunoassay. Data presented as mean  $\pm$  S.D. *P* values were  
621 calculated using 2-way ANOVA with Dunnett's multiple comparison test using Prism (9.1) software.

622

623 **Figure 6. Downregulation of *EIF2D* does not reduce expression levels of poly-PG and poly-PR.**

624 (A) A gRNA targeted the second exon of human *EIF2D* (see Materials and Methods). (B)

625 After CRISPR/Cas9-mediated gene editing, the *EIF2D* knockout (EIF2DKO) HEK293 cells carried

626 different mutations on each allele. (C) Cell lysates from WT and EIF2DKO HEK293 cells were

627 processed for Western blotting, and immunostained with antibodies to eIF2D and  $\alpha$ -tubulin. (D-E) WT

628 and EIF2DKO HEK293 cells were cotransfected with fLuc plasmid along with AS-C9 plasmids. The

629 level of luciferase activity was assessed by dual luciferase assays. (F-G) WT HEK293 cells were

630 transfected with fLuc and AS-C9 plasmids along with anti-EIF2D shRNA. The level of luciferase

631 activity was assessed by dual luciferase assays. Unpaired t test was performed. N = 3. mean  $\pm$  s.e.m.

632

633

634 **Supplementary File 1: List of primers used for this study**

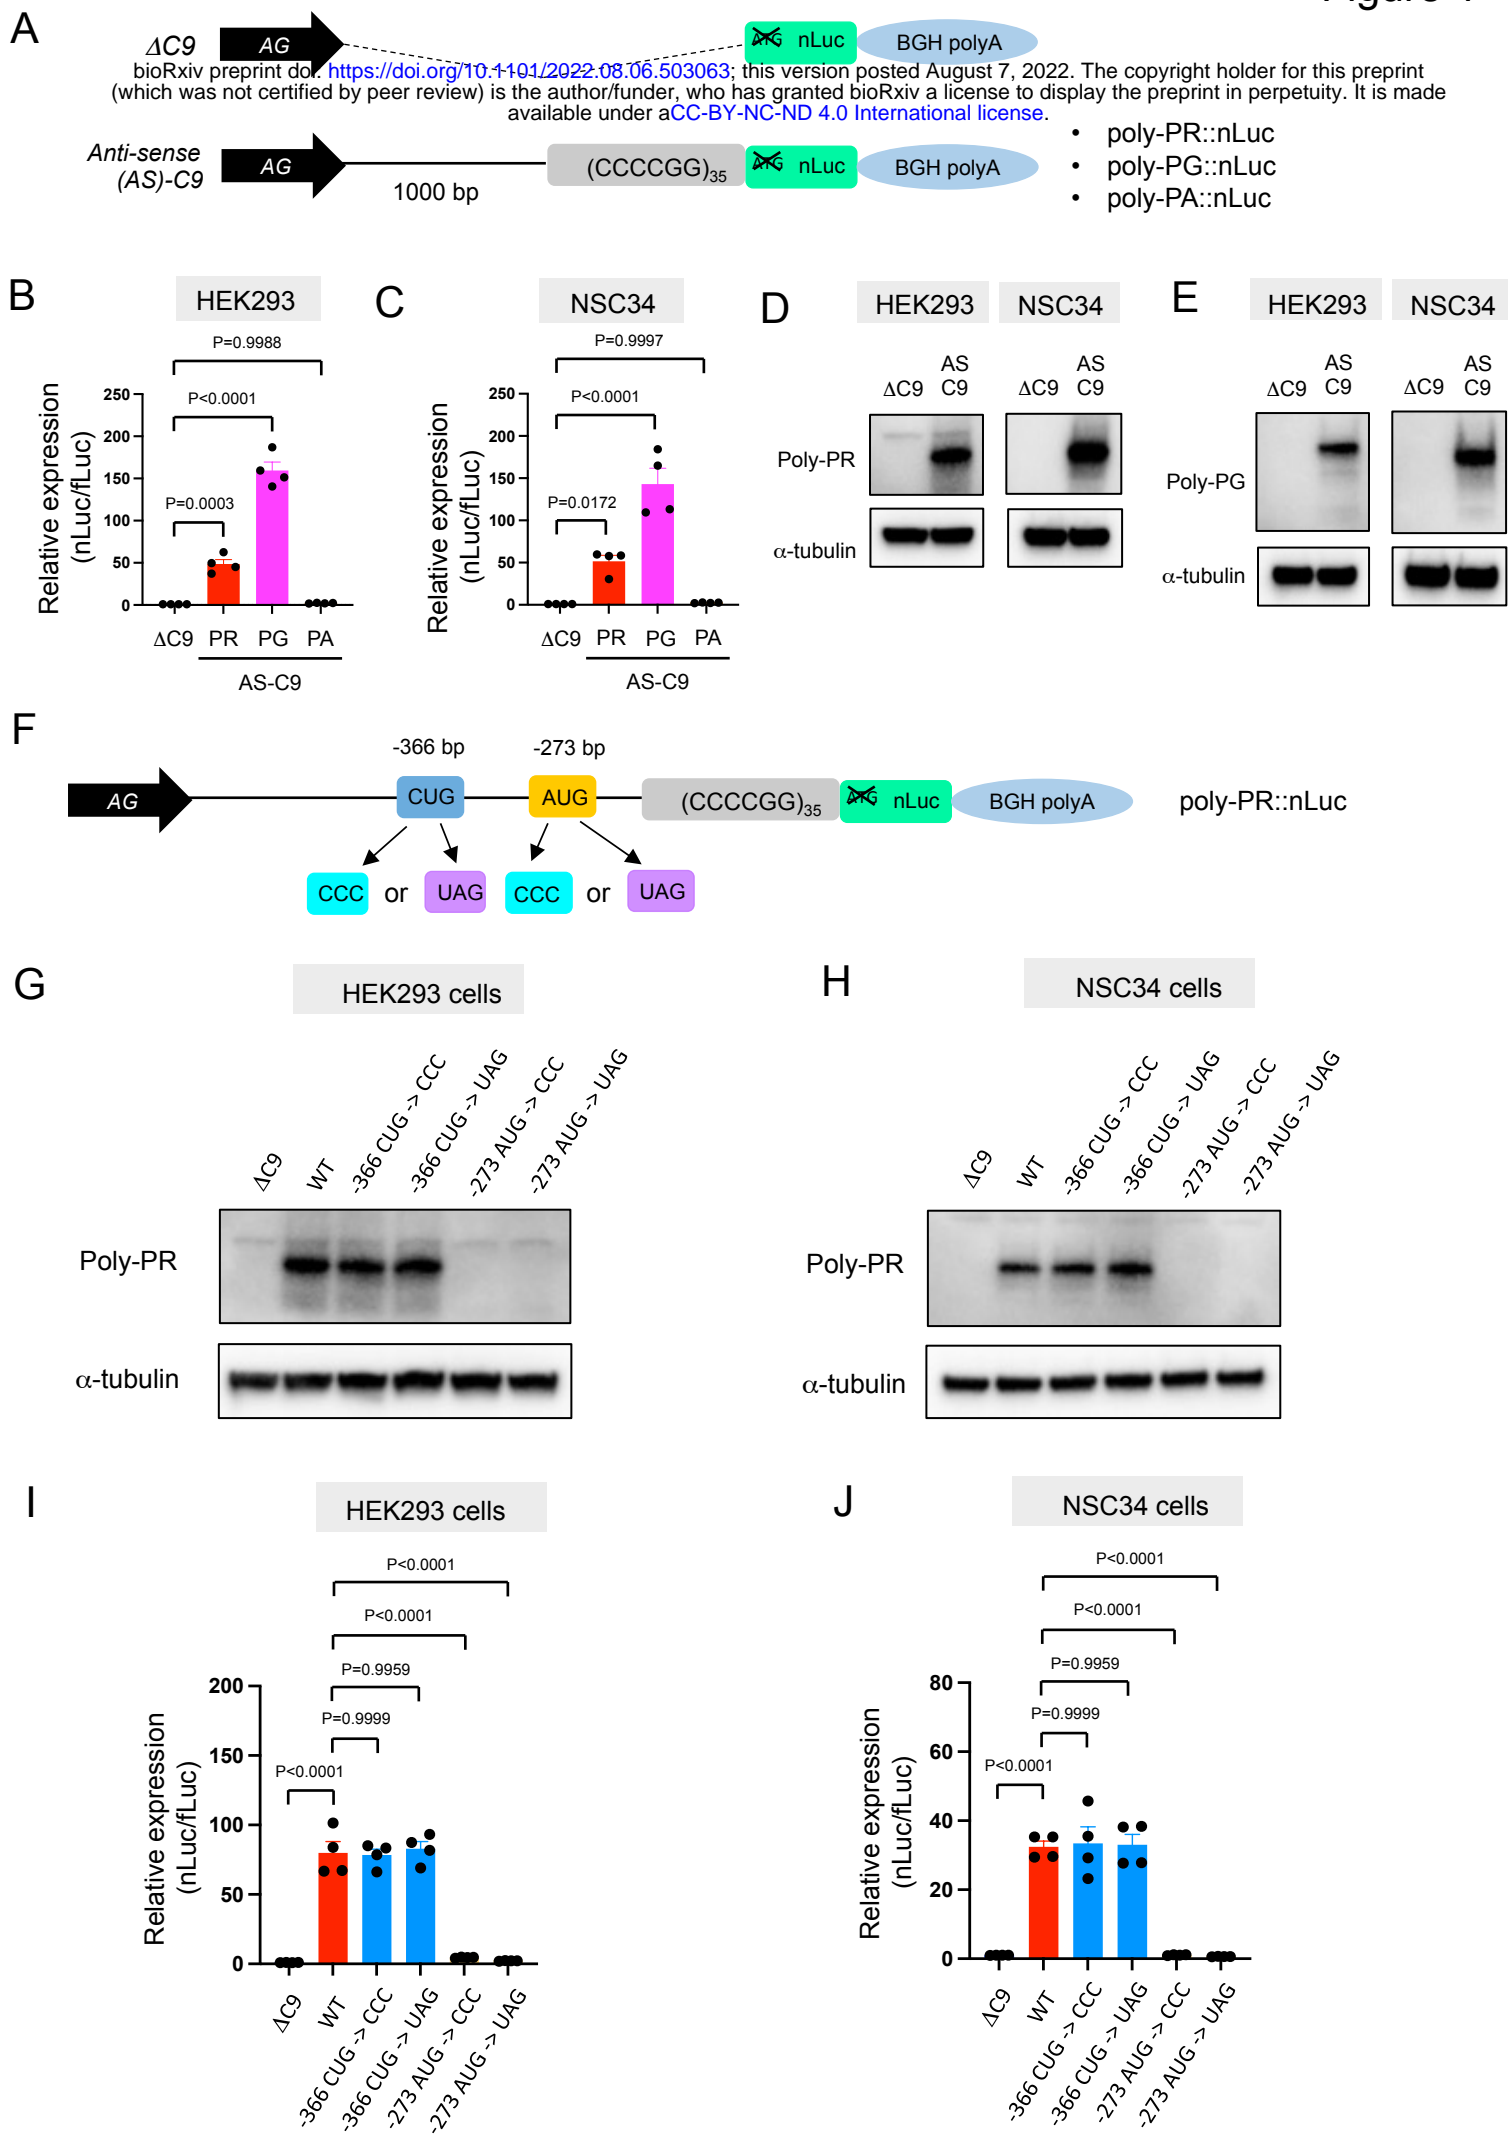

A bioRxiv preprint doi: <https://doi.org/10.1101/2022.08.06.503063>; this version posted August 7, 2022. The copyright holder for this preprint (which was not certified by peer review) is the author/funder, who has granted bioRxiv a license to display the preprint in perpetuity. It is made available under aCC-BY-NC-ND 4.0 International license.

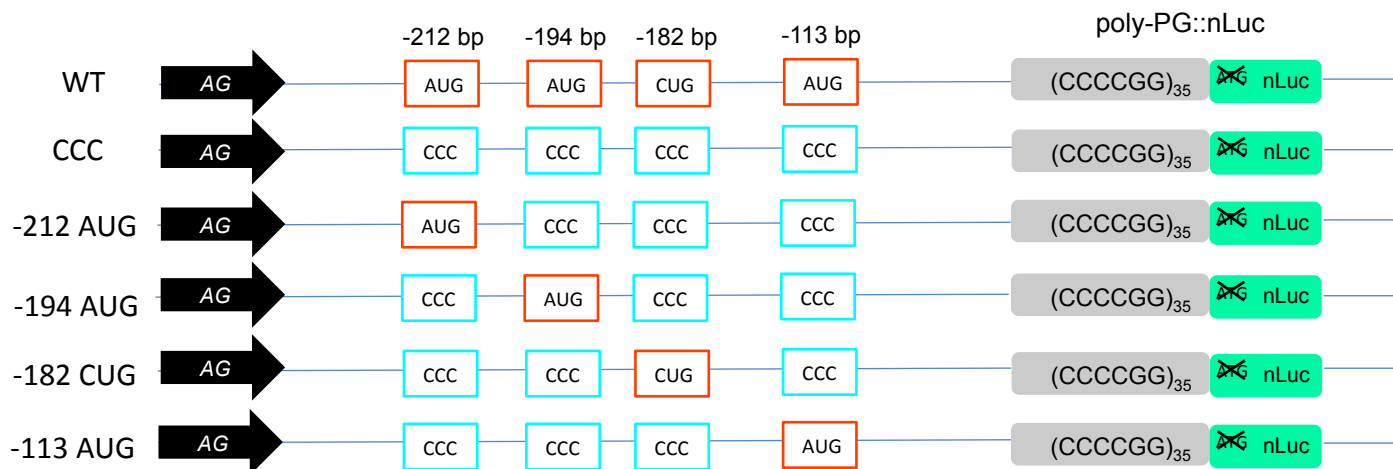

B

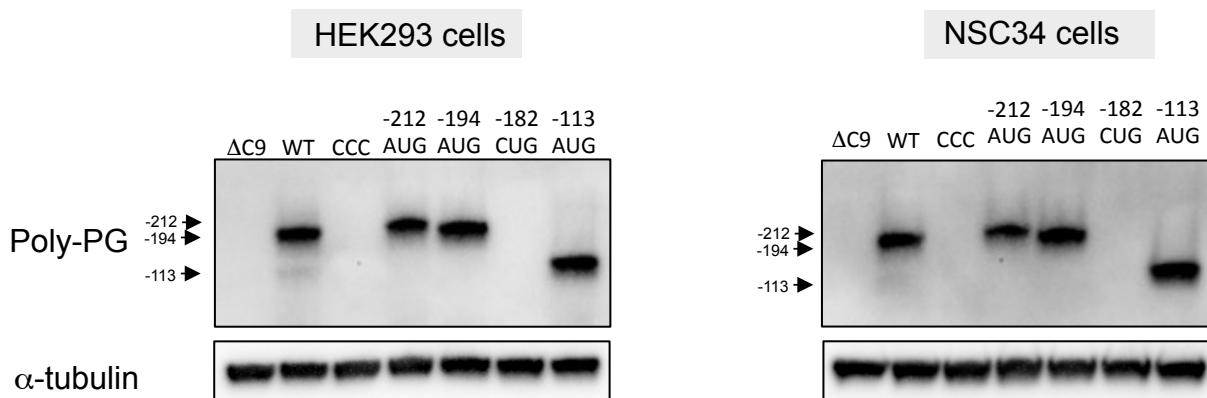

C

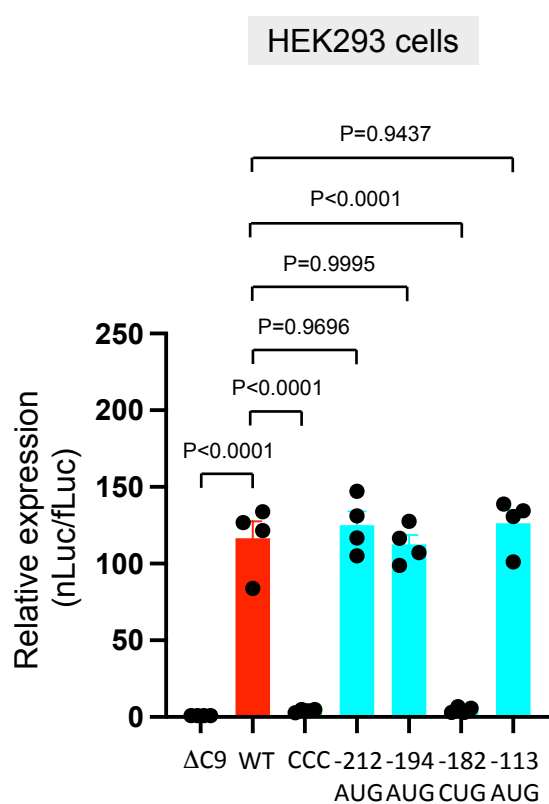

D

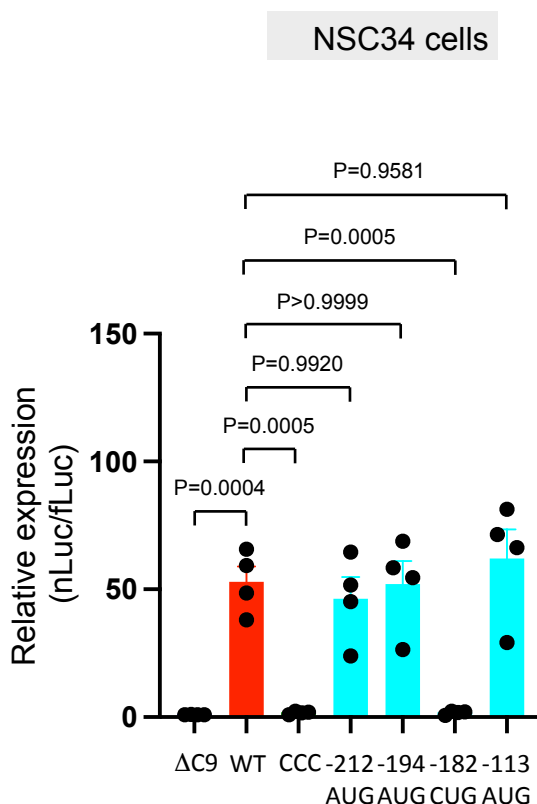

bioRxiv preprint doi: <https://doi.org/10.1101/2022.08.06.503063>; this version posted August 7, 2022. The copyright holder for this preprint (which was not certified by peer review) is the author/funder, who has granted bioRxiv a license to display the preprint in perpetuity. It is made available under a [CC-BY-NC-ND 4.0 International license](https://creativecommons.org/licenses/by-nc-nd/4.0/).

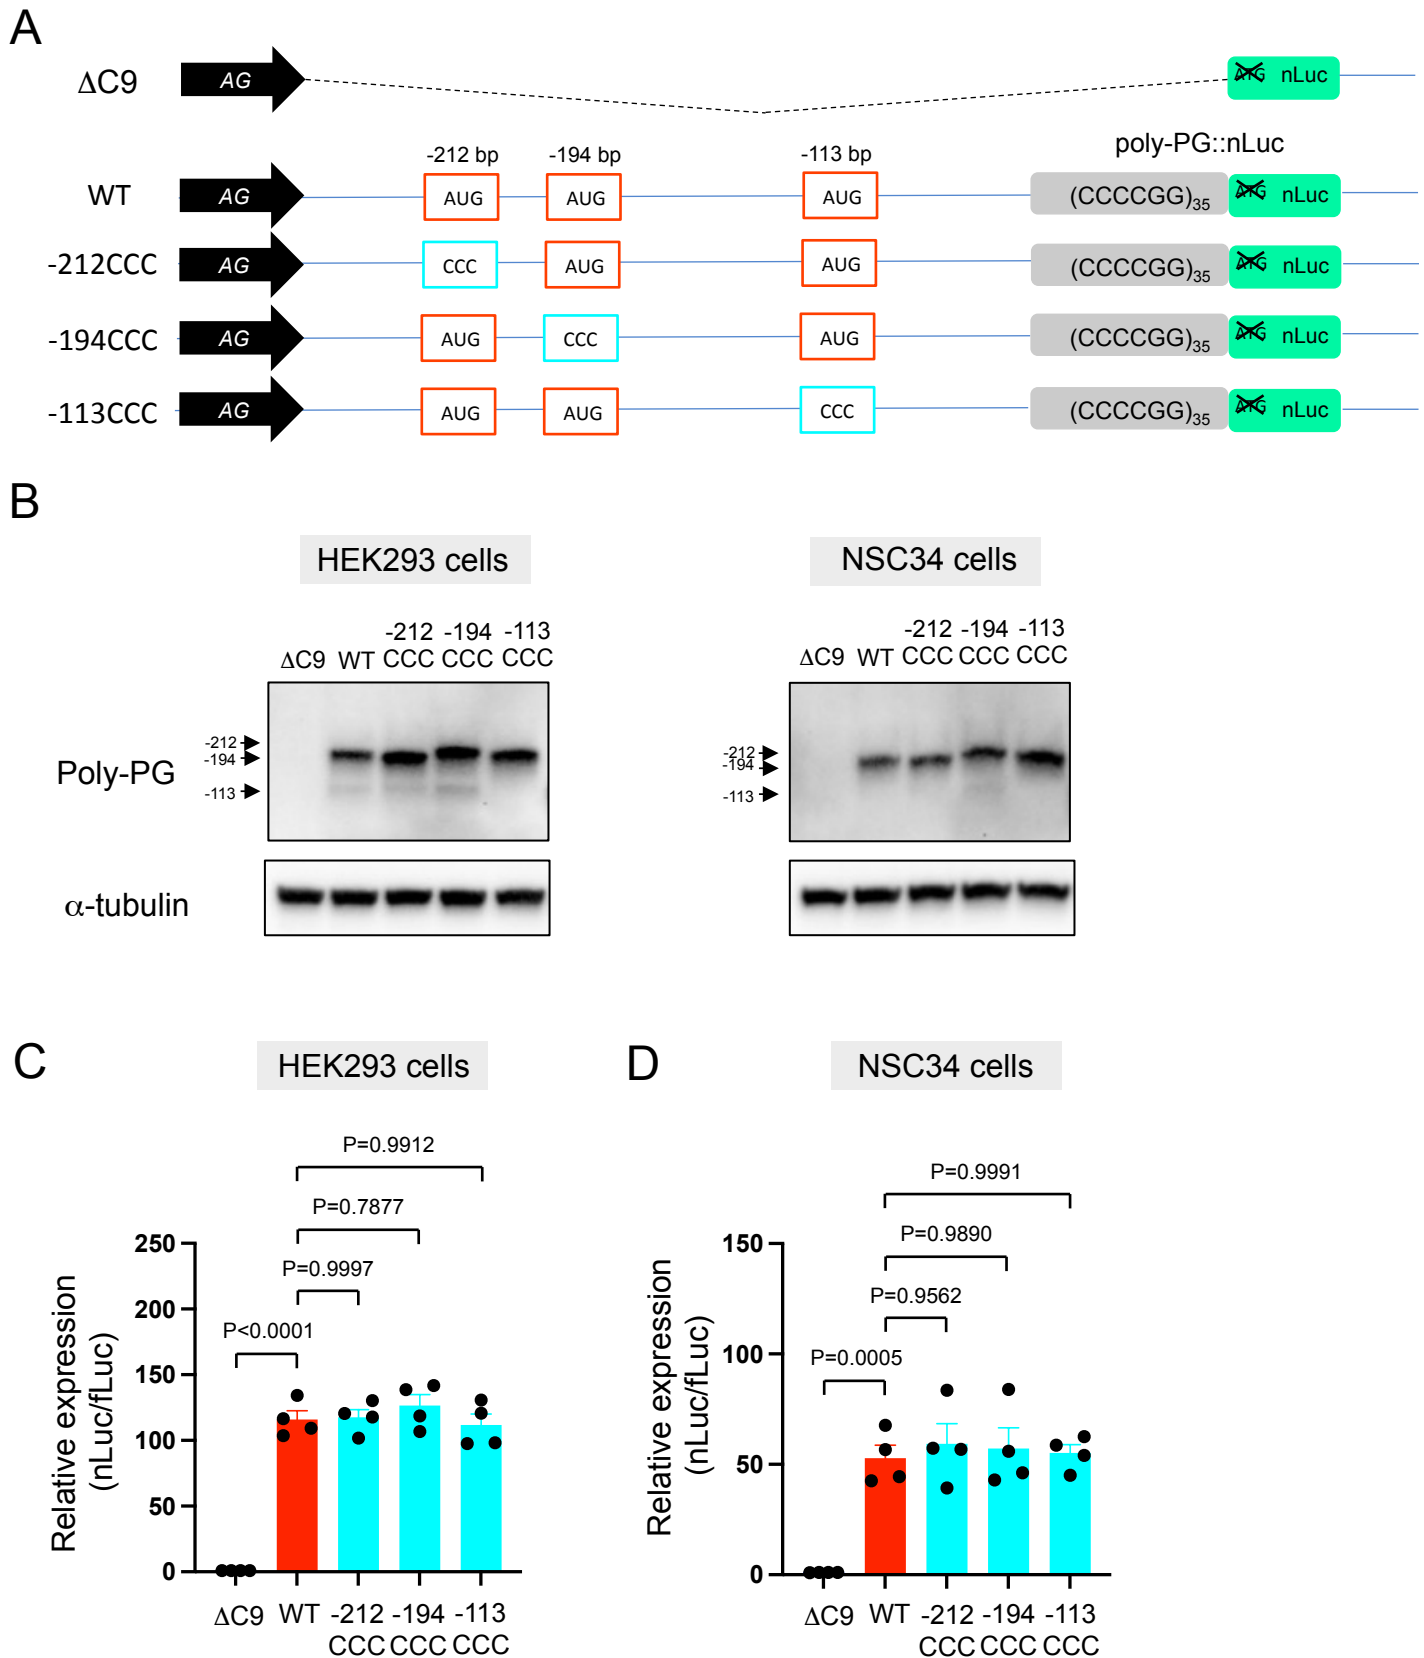

bioRxiv preprint doi: <https://doi.org/10.1101/2022.08.06.503063>; this version posted August 7, 2022. The copyright holder for this preprint (which was not certified by peer review) is the author/funder, who has granted bioRxiv a license to display the preprint in perpetuity. It is made available under a [CC-BY-NC-ND 4.0 International license](#).

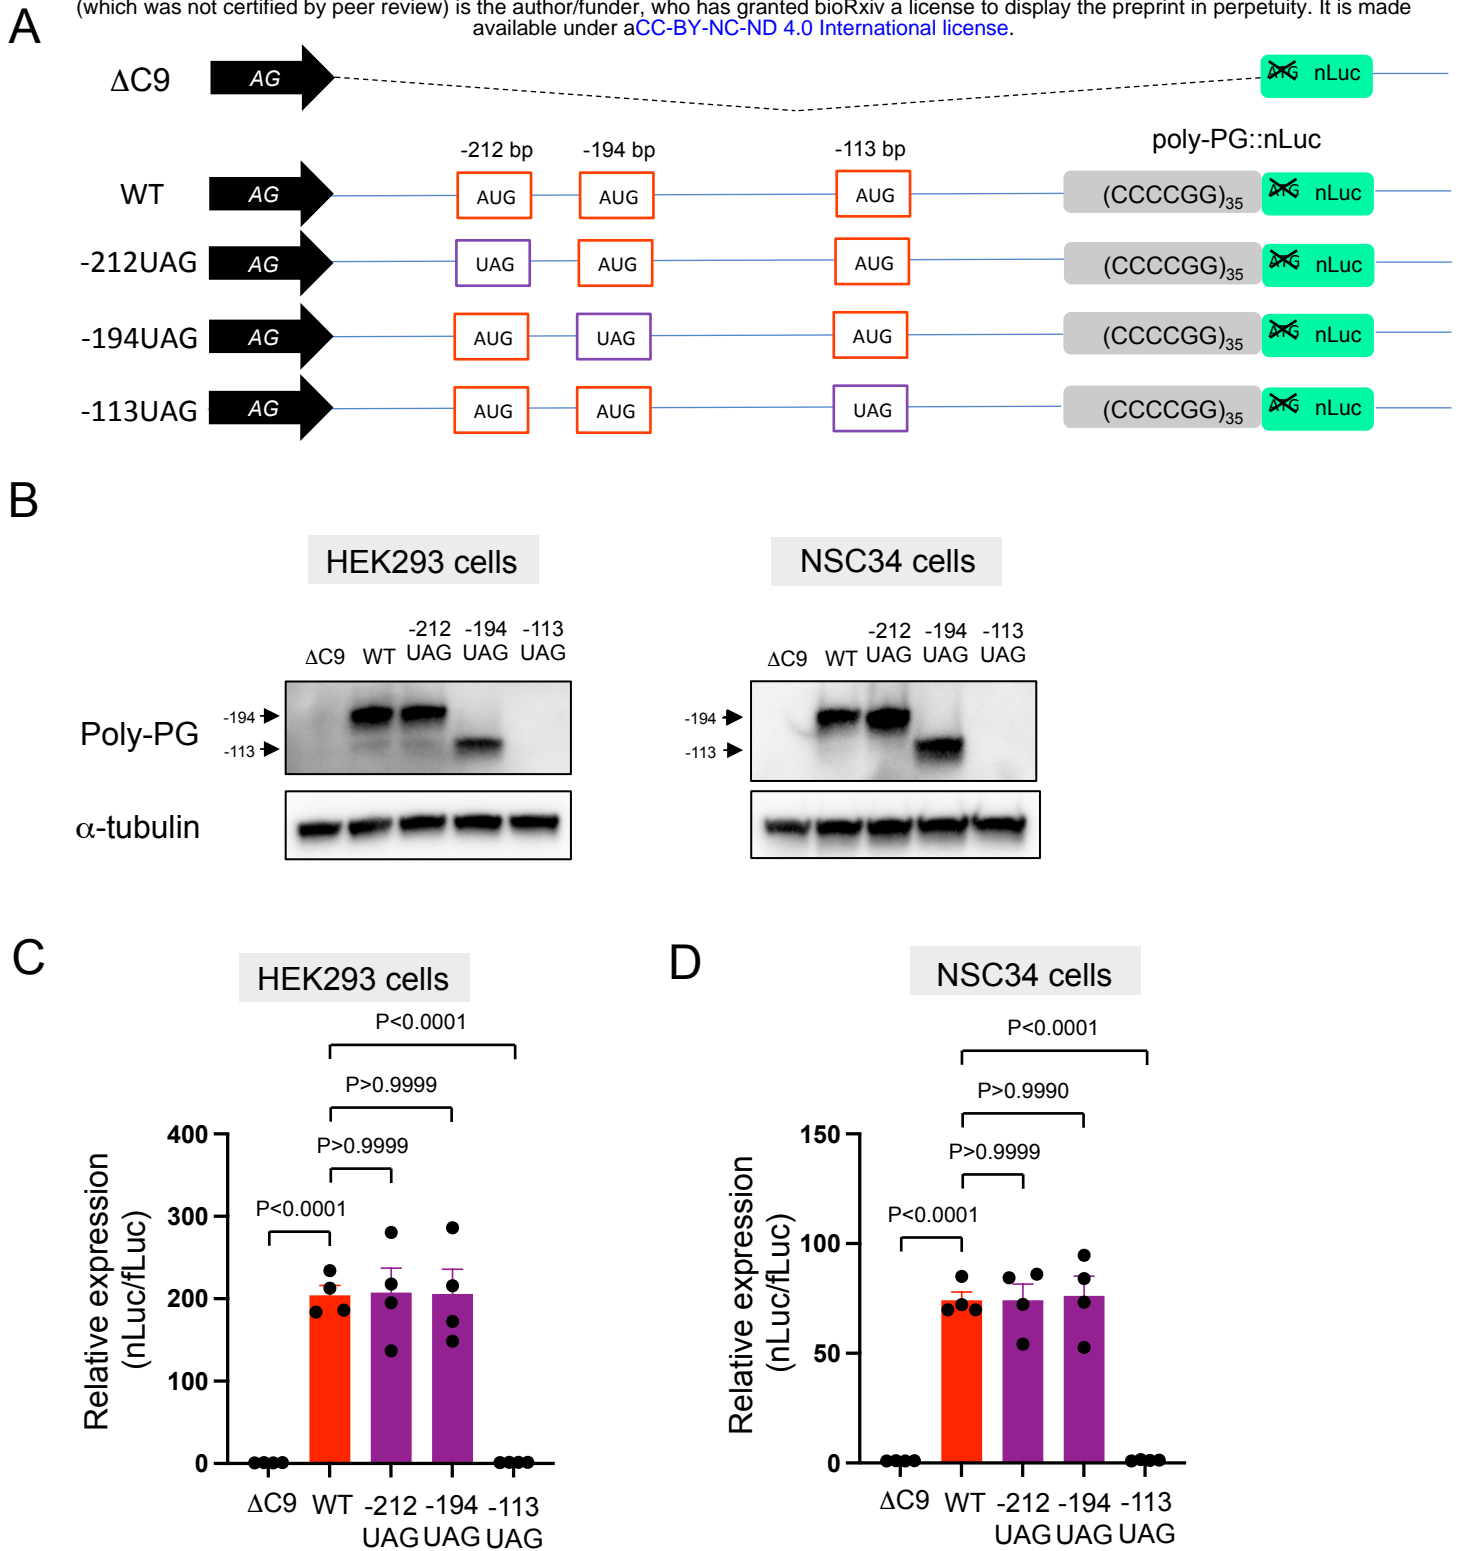

# Figure 5

bioRxiv preprint doi: <https://doi.org/10.1101/2022.08.06.503063>; this version posted August 7, 2022. The copyright holder for this preprint (which was not certified by peer review) is the author/funder, who has granted bioRxiv a license to display the preprint in perpetuity. It is made available under a [CC-BY-NC-ND 4.0 International license](#).

## A

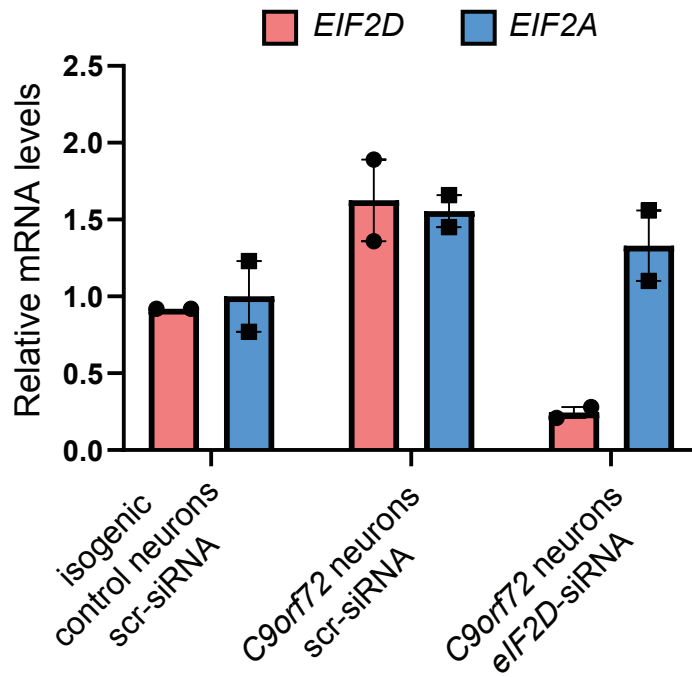

## B

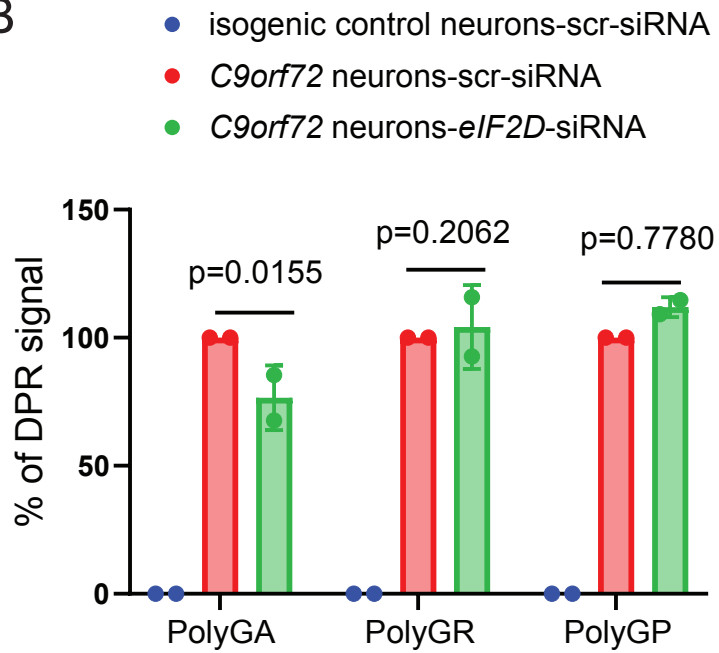

bioRxiv preprint doi: <https://doi.org/10.1101/2022.08.06.503063>; this version posted August 7, 2022. The copyright holder for this preprint (which was not certified by peer review) is the author/funder, who has granted bioRxiv a license to display the preprint in perpetuity. It is made available under a [CC-BY-NC-ND 4.0 International license](https://creativecommons.org/licenses/by-nc-nd/4.0/).

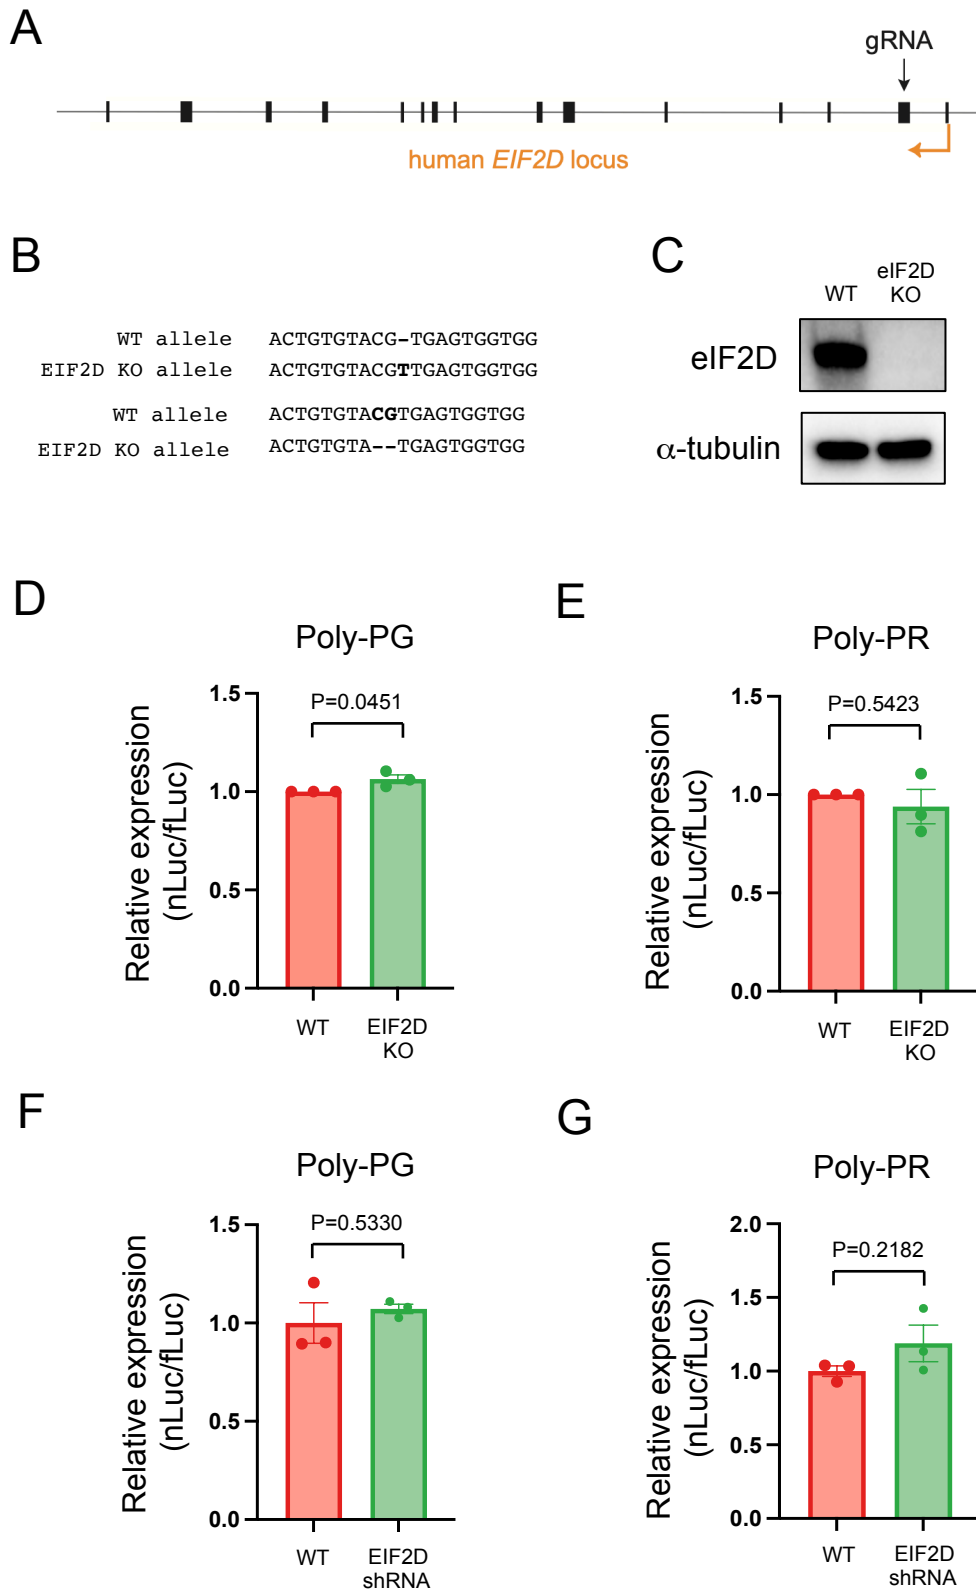

Source: http://biorxiv.org/content/10.1101/2022.08.06.503063v1.full.pdf
